# Supplementary material for: Thyroid cancer susceptibility polymorphisms: confirmation of loci on chromosomes 9q22 and 14q13, validation of a recessive 8q24 locus and failure to replicate a locus on 5q24
Source: PubMed Central journal article supplement — J Med Genet. 2012 Jan 25;49(3):158–63. doi: 10.1136/jmedgenet-2011-100586 (PMC3286794; doi:10.1136/jmedgenet-2011-100586), 2012-01-25

**Supplementary Material for**

**Thyroid cancer susceptibility polymorphisms: confirmation of loci on chromosomes 9q22, 5q24 and 14q13, validation of a recessive 8q24 locus and failure to replicate a locus on 5q24**

Angela M. Jones, Kimberley M. Howarth, Lynn Martin, Maggie Gorman, Radu Mihai, Laura Moss, Adam Auton, Catherine Lemon, Hisham Mehanna, Hosahalli Mohan, Susan E.M. Clarke, Jonathan Wadsley, Elena Macias, Andrew Coatesworth, Matthew Beasley, Tom Roques, Craig Martin, Paul Ryan, Georgina Gerrard, Danielle Power, Caroline Bremner, The TCUKIN Consortium, Ian Tomlinson and Luis G. Carvajal-Carmona

Supplementary Table 1. Kaspar probe sequences used to genotype the markers examined in this study

| SNP       | Probe                | Sequence                                               |
|-----------|----------------------|--------------------------------------------------------|
| rs2910164 | Allele C             | GAAGGTGACCAAGTTCATGCTGGTTGTGTCAGTGTGTCAGACCTC          |
|           | Allele G             | GAAGGTCGGAGTCAACGGATTGGTTGTGTCAGTGTGTCAGACCTG          |
|           | Common               | CGATGACAGAGATATCCCAGCTGAA                              |
| rs6983267 | Allele G             | GAAGGTGACCAAGTTCATGCTCATAAAAAATTCTTTGTACTTTTCTCAGTGC   |
|           | Allele T             | GAAGGTCGGAGTCAACGGATTCACATAAAAAATTCTTTGTACTTTTCTCAGTGA |
|           | Common               | CCAGAGTTAATACCCTCATCGTCCTT                             |
| rs965513  | Allele A             | GAAGGTGACCAAGTTCATGCTGTGGCTGGAATGGAACAGATCAAAA         |
|           | Allele G             | GAAGGTCGGAGTCAACGGATTGGCTGGAATGGAACAGATCAAAG           |
|           | Common               | GTCTTTGTTAGCATTGTGAGAACAGACTA                          |
|           | Allele A             | GAAGGTGACCAAGTTCATGCTCCAGAGTCCAGTCCCGGTCA              |
|           | Allele G             | GAAGGTCGGAGTCAACGGATTCAGAGTCCCGGTGCG                   |
| Common    | GGTGCTTCTCGAGGCGGGCA |                                                        |
| rs944289  | Allele C             | GAAGGTGACCAAGTTCATGCTCAATTTAATTTGGTTGAAAGATAGTCATTGC   |
|           | Allele T             | GAAGGTCGGAGTCAACGGATTGCAATTTAATTTGGTTGAAAGATAGTCATTGT  |
|           | Common               | GGACATTAGATTATTTAAATTCAGCTA                            |

Supplementary Table 2. 9q22 SNPs that are in high linkage disequilibrium ( $r^2 > 0.5$ ) with both rs1867277 and rs965513. Data from the 1000 Genomes Project Phase 1, Interim release, May 11 2011.

| <b>SNP</b> | <b>Location on chromosome 9</b> | <b><math>r^2</math> with rs955513</b> | <b><math>r^2</math> with rs1877277</b> |
|------------|---------------------------------|---------------------------------------|----------------------------------------|
| rs6478413  | 100,582,024                     | 0.54                                  | 0.64                                   |
| rs10124220 | 100,583,074                     | 0.59                                  | 0.71                                   |
| rs1443432  | 100,583,195                     | 0.54                                  | 0.64                                   |
| rs7848973  | 100,588,839                     | 0.58                                  | 0.70                                   |

Supplementary Table 3. Association between rs2910164 genotypes and thyroid cancer risk using genotypic, Cochran-Armitage trend, allelic, dominant, recessive and heterozygous disease models

| <b>Test</b>  | <b>Counts in<br/>all TC cases</b> | <b>Counts in<br/>All controls</b> | <b>P<br/>all cases</b> | <b>P<br/>papillary cases</b> |
|--------------|-----------------------------------|-----------------------------------|------------------------|------------------------------|
| Genotypic    | 41/277/436                        | 339/2179/3540                     | 0.913                  | 0.938                        |
| Trend        | 360/1156                          | 2857/9259                         | 0.846                  | 0.919                        |
| Allelic      | 359/1149                          | 2857/9259                         | 0.846                  | 0.919                        |
| Dominant     | 318/439                           | 2518/3540                         | 0.749                  | 0.825                        |
| Recessive    | 41/713                            | 339/5719                          | 0.858                  | 0.836                        |
| Heterozygous | 277/477                           | 2179/3879                         | 0.708                  | 0.784                        |

Supplementary Table 4. Proportion of thyroid cancer heritability explained by four SNPs at chromosome 8q24, 9q22 and 14q13.

| <b>SNP</b>             | <b>OR per allele<sup>1</sup></b> | <b>Attributable sibling relative risk</b> |
|------------------------|----------------------------------|-------------------------------------------|
| rs6983267              | 1.140                            | 0.007                                     |
| rs965513               | 1.780 (1.981)                    | 0.045                                     |
| rs1867277              | 1.29- (1.749)                    | 0.043                                     |
| rs944289               | 1.330                            | 0.018                                     |
|                        |                                  |                                           |
| Combined               | 3.760                            | 0.111                                     |
| No effect of rs1867277 | 3.995                            | 0.066                                     |
| No effect of rs965513  | 3.813                            | 0.064                                     |
|                        |                                  |                                           |

<sup>1</sup>. For the 9q22 markers we show their ORs obtained from the logistic regression testing when both genotypes are incorporated models and the ORs when they are analyses separately (in parenthesis)

Supplementary Table 5. Number of risk alleles at rs6983267, rs965513, rs1867277 and rs944289 in thyroid cases and controls.

| <b>Number of alleles</b> | <b>Cases (n=755)</b> | <b>Controls (=6076)</b> |
|--------------------------|----------------------|-------------------------|
| 0                        | 2 (0.3%)             | 84 (1.4%)               |
| 1                        | 19(2.5%)             | 389(6.4%)               |
| 2                        | 61(8.1%)             | 1008(16.6%)             |
| 3                        | 123(16.3%)           | 1439(23.7%)             |
| 4                        | 182(24.1%)           | 1371(22.6%)             |
| 5                        | 171(22.6%)           | 969(15.9%)              |
| 6                        | 121 (16%)            | 562(9.2%)               |
| 7                        | 59 (7.8%)            | 213(3.5%)               |
| 8                        | 17(2.3%)             | 41(0.7%)                |

Supplementary Figure 1. Linkage disequilibrium plots for rs965513 (A) and rs1867277 (B). The approximate location of the seven 9q22 genes is shown on top of the figure. The vertical dotted lines in the middle of each figure indicate the position of rs965513 and rs1867277, respectively.  $r^2$  values between either rs965513 or rs1867277 and surrounding markers are shown in the y-axis. The x-axis shows the physical positions of markers on chromosome 9q22. Synonymous variants are highlighted in green circles, non-synonymous variants are highlighted in red circles and premature stop generating variants are highlighted with red crosses.

A)

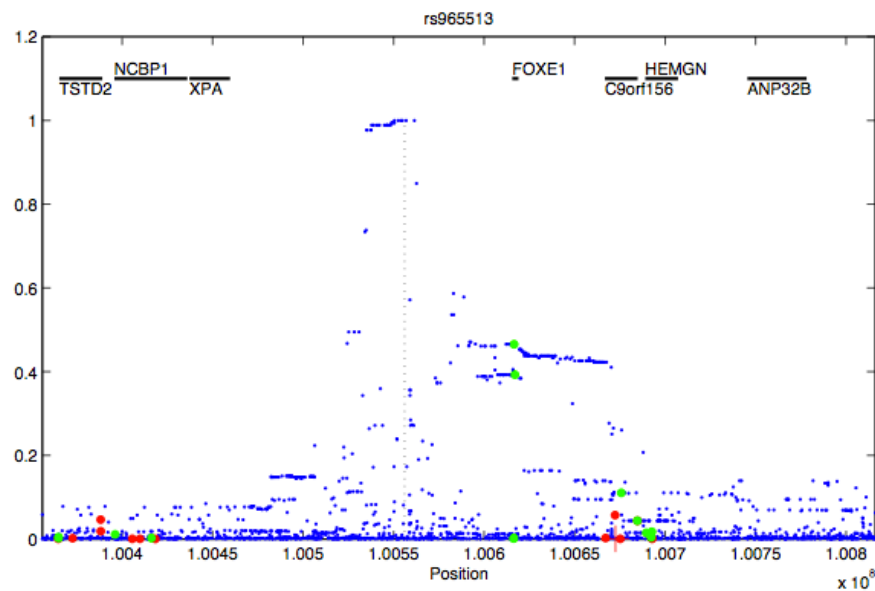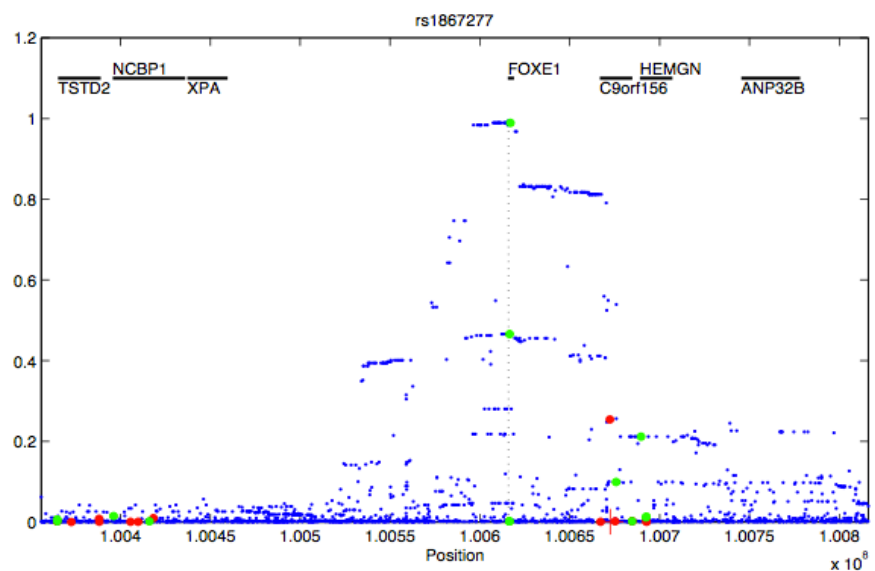

Supplementary Figure 2. Meta-analysis of associations between the rs6983267G allele and thyroid cancer

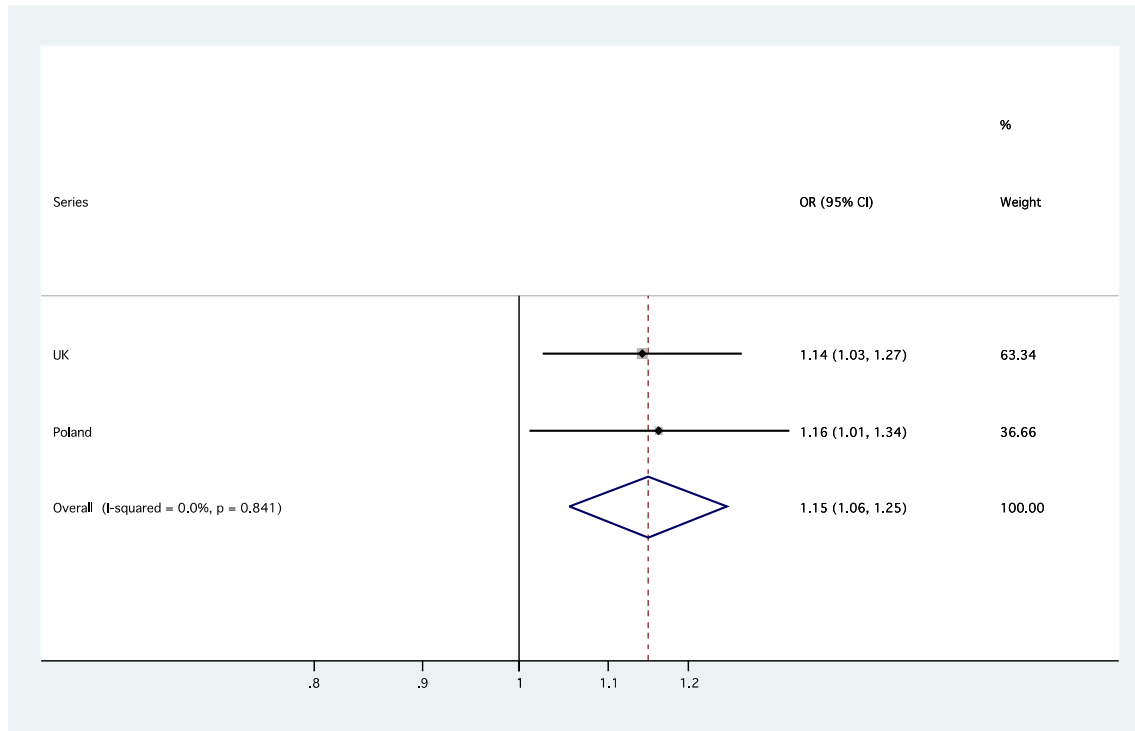

Supplement: jmedgenet-2011-100586-s1.pdf [file jmedgenet-2011-100586-s1.pdf]
